# Supplementary material for: 18F-DCFPyL (PSMA) PET as a radiotherapy response assessment tool in metastatic prostate cancer
Source: PubMed Central journal article supplement — Clin Transl Radiat Oncol. 2023 Jan 18;39:100583. doi: 10.1016/j.ctro.2023.100583 (PMC9879766; doi:10.1016/j.ctro.2023.100583), 2023-01-18

# Supplemental figures

**Figure s1: Heterogeneity of PSMA expression in human prostate tumors. (A.)** Additional low power fields (10x) of IHC images from prostatectomy tissue. The patient was diagnosed with ISUP Grade Group 2 disease adenocarcinoma, acinar type. 3 separate representative tumor areas are shown (top, middle, bottom rows). Hematoxylin & Eosin (H&E; left column),  $\alpha$ -methylacyl-CoA racemase (AMACR; middle column), and PSMA (right column) staining is shown for each region. Red arrows indicate malignant glands with PSMA staining; blue arrows indicate malignant glands without PSMA staining (their malignant nature is confirmed by corresponding AMACR IHC staining).

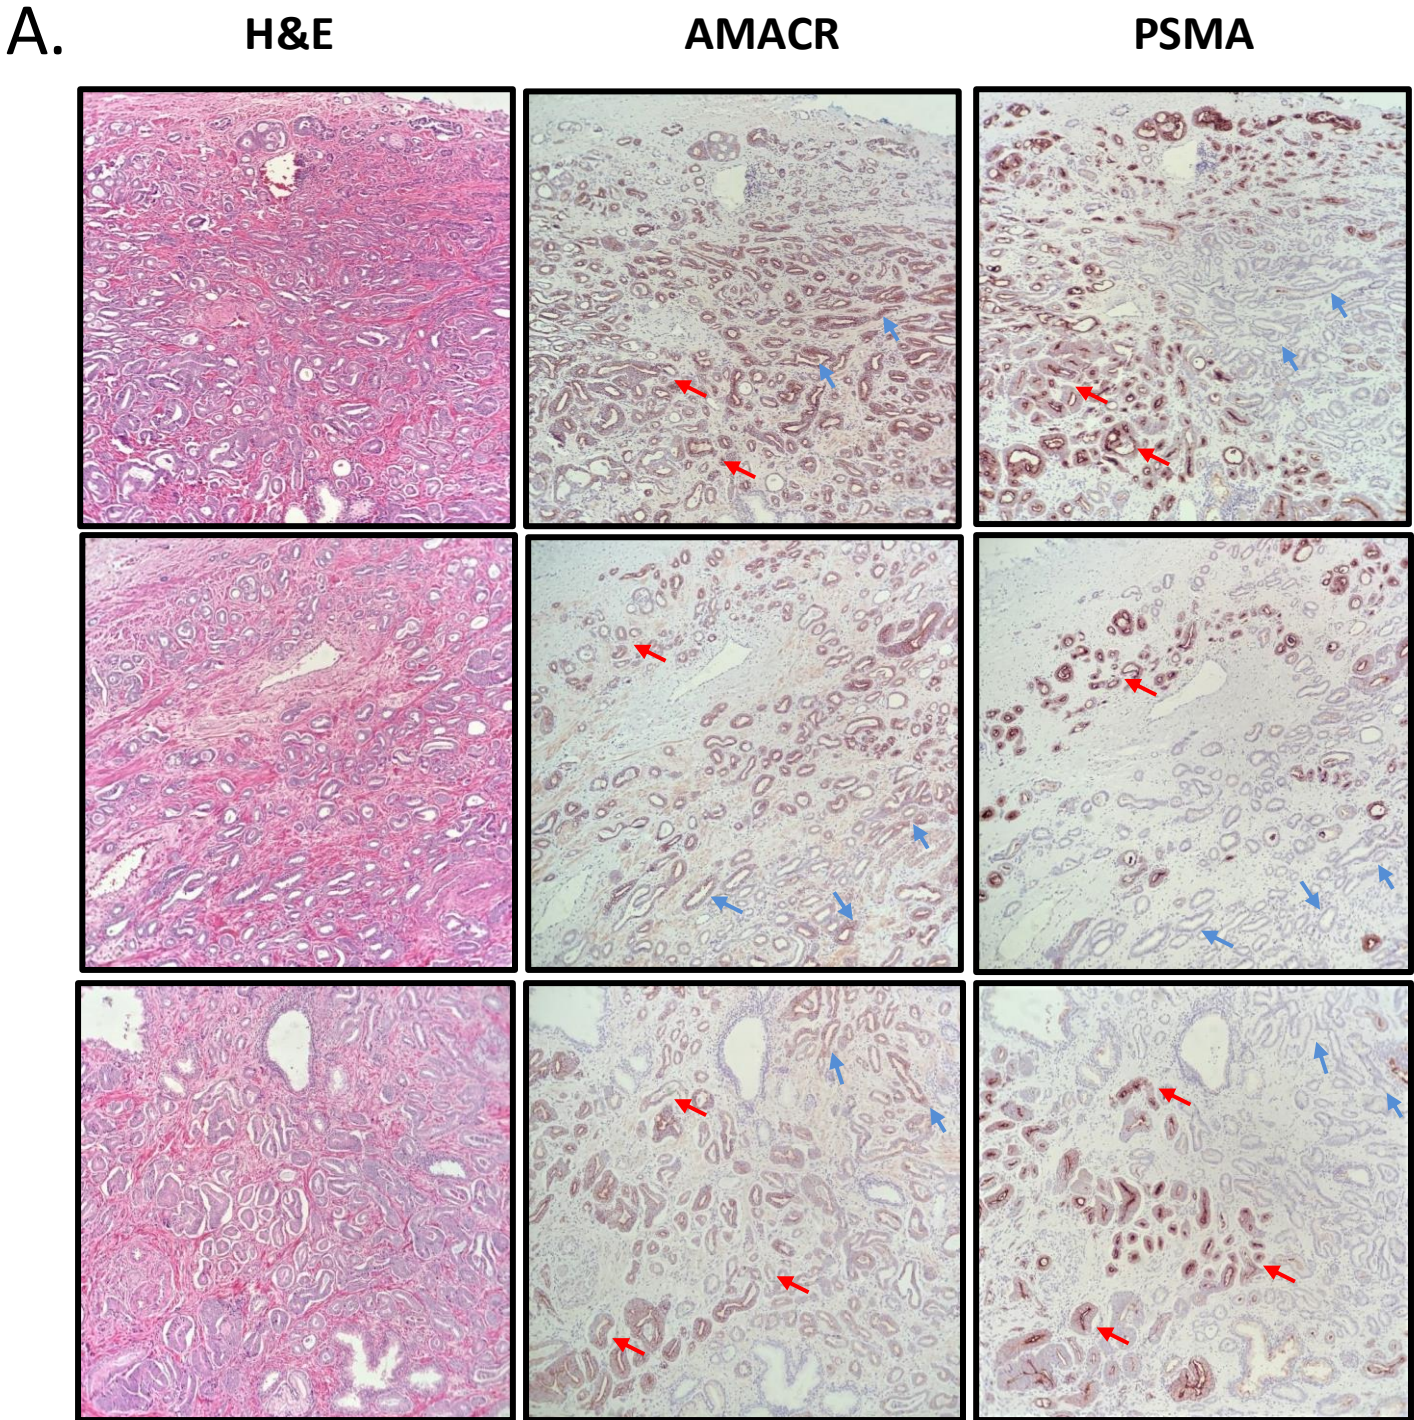



**Figure s1: B.** Low power (10x magnification) IHC images from transrectal ultrasound (TRUS) – guided needle biopsies. The patient was diagnosed with ISUP Grade Group 1 disease adenocarcinoma, acinar type. Red arrows, single glands with Gleason score (GS) 3 expressing moderate to strong PSMA; blue arrows, single glands negative for PSMA expression.

**B.**

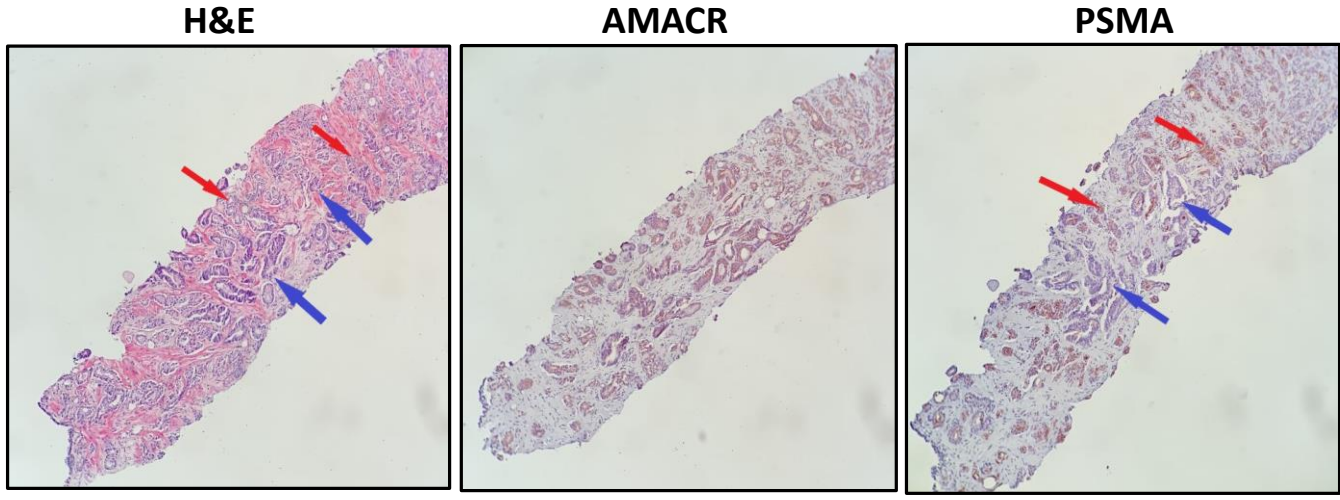

**Figure s2. Regulation of proliferation and tumor growth by radiation (RT) in prostate cancer parental 22RV1-P and radio-resistant 22RV1-RR cells and tumors. (A.)** Radiation therapy (RT) (0-8Gy) effects on cell proliferation in 22RV1-P (parental) and 22RV1-RR (radio-resistant) prostate cancer cell lines. **(B.)** Tumor growth curves and **(C.)** Kaplan-Meier survival curves of untreated and irradiated (5Gy) animals grafted with parental (22RV1-P) or radio-resistant (22RV1-RR) PrCa cells (n=6 per group). Survival endpoint was set as the timepoint of animal death, or the time tumors reached the size of 2200mm<sup>3</sup>.

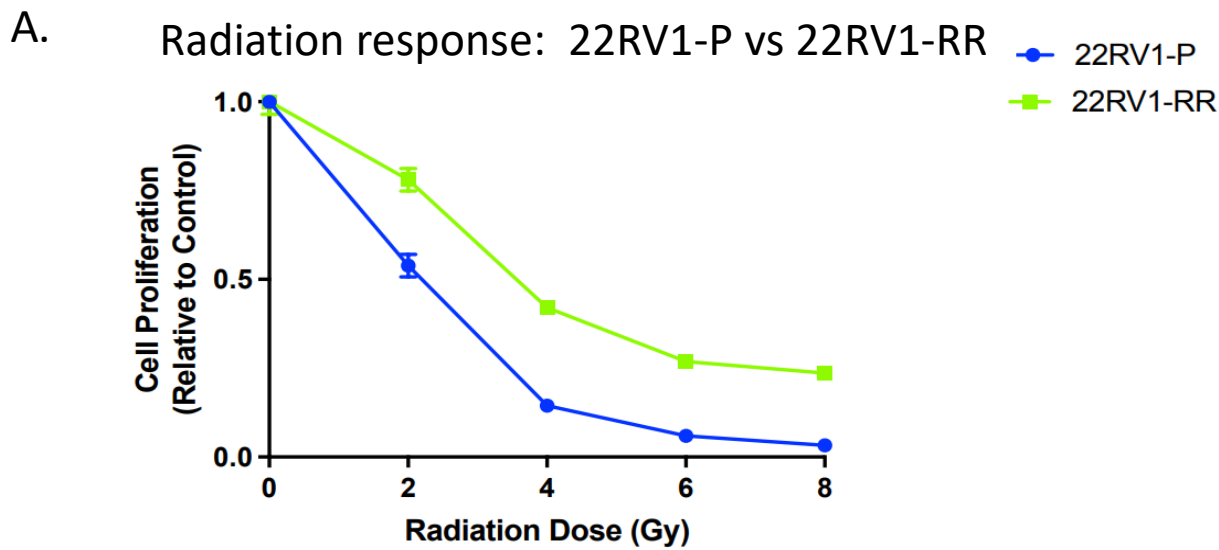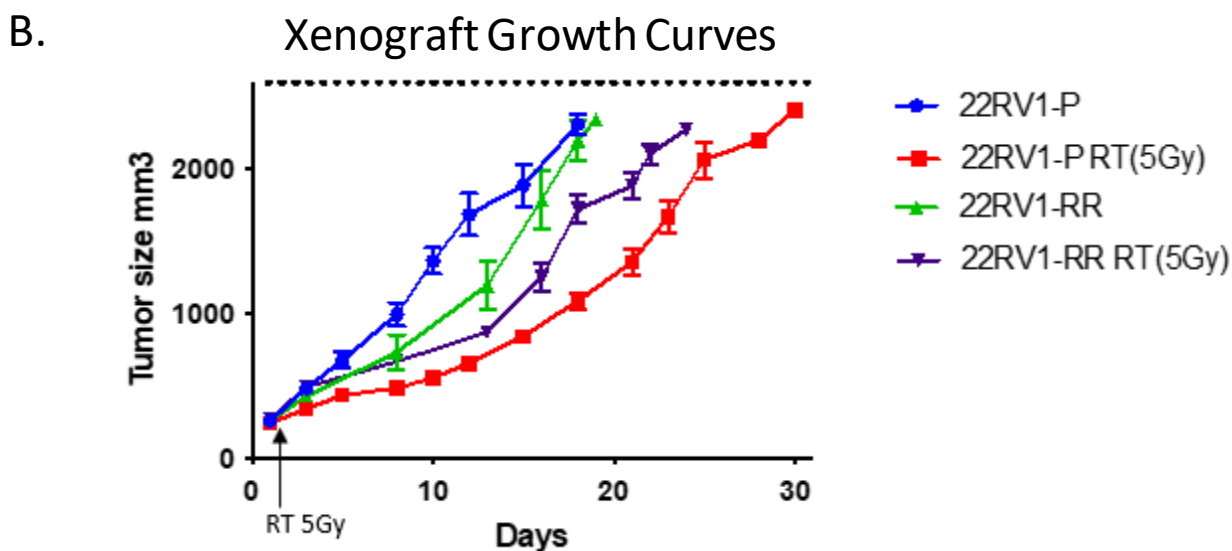

C.

### K-M Survival Curves

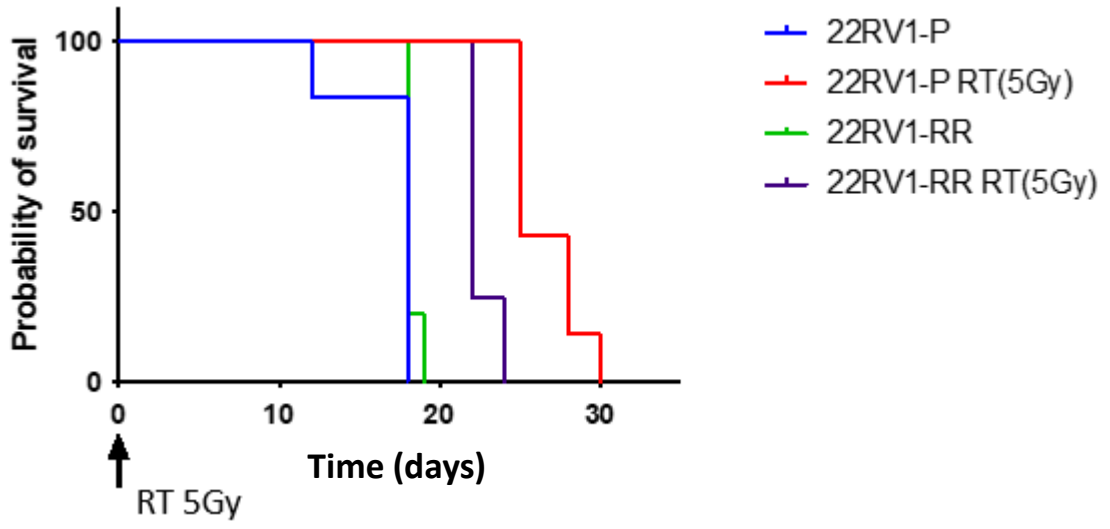

Supplement: mmc1.pdf [file mmc1.pdf]
